# Supplementary material for: Effectiveness of Antimicrobial Photodynamic Therapy in the Treatment of Periodontitis: A Systematic Review and Meta-Analysis of In Vivo Human Randomized Controlled Clinical Trials
Source: MDPI journal article supplement (doi:10.3390/pharmaceutics13060836), 2021-06-04
Supplement: s1 [file s1]

# Supplementary Materials: Effectiveness of Antimicrobial Photodynamic Therapy in the Treatment of Periodontitis: A Systematic Review and Meta-Analysis of In Vivo Human Randomized Controlled Clinical Trials

Snehal Dalvi, Stefano Benedicenti, Tudor Sălăgean, Ioana Roxana Bordea and Reem Hanna

## List of abbreviations [In alphabetical order]

| Scheme . | Abbreviation    | Full Form                                      |
|----------|-----------------|------------------------------------------------|
| 1.       | aPDT            | Antimicrobial Photodynamic Therapy             |
| 2.       | A.a             | Aggregatibacter actinomycetemcomitans          |
| 3.       | AgP             | Aggressive Periodontitis                       |
| 4.       | AAP             | American Academy of Periodontology             |
| 5.       | AB              | Systemic or local antibiotics                  |
| 6.       | BD              | Twice daily                                    |
| 7.       | BOP             | Bleeding on probing                            |
| 8.       | COX-2           | Cyclooxygenase- 2                              |
| 9.       | CAL             | Clinical attachment level                      |
| 10.      | CCRCT           | Cochrane Central Register of Controlled Trials |
| 11.      | CLM             | Clarithromycin                                 |
| 12.      | CP              | Chronic periodontitis                          |
| 13.      | CRP             | C-reactive protein.                            |
| 14.      | CI              | Confidence interval                            |
| 15.      | cm              | Centimeter                                     |
| 16.      | cm <sup>2</sup> | Square centimeter                              |
| 17.      | DF              | Degrees of freedom                             |
| 18.      | ELISA           | Enzyme-linked immunosorbent assay              |
| 19.      | et al           | And others                                     |
| 20.      | FGF-2           | Fibroblast growth factor 2                     |
| 21.      | FMPI            | Full mouth plaque index                        |
| 22.      | FMBOP           | Full mouth bleeding on probing                 |
| 23.      | F.n.            | Fusobacterium nucleatum                        |
| 24.      | GI              | Gingival index                                 |
| 25.      | GBI             | Gingival bleeding index                        |
| 26.      | GCF             | Gingival crevicular fluid                      |
| 27.      | GR              | Gingival recession                             |
| 28.      | IL- 1 $\beta$   | Interleukin-1 beta                             |
| 29.      | IF- $\gamma$    | Interferon- gamma                              |

|     |                   |                                                                       |
|-----|-------------------|-----------------------------------------------------------------------|
| 30. | IF                | Impact Factor                                                         |
| 31. | I <sup>2</sup>    | Statistical test for percentage variation due to heterogeneity        |
| 32. | J                 | Joule                                                                 |
| 33. | J/cm <sup>2</sup> | Joules per square centimeter                                          |
| 34. | LLLT              | Low level laser therapy                                               |
| 35. | MB                | Methylene blue                                                        |
| 36. | MeSH              | Medical Subject Headings                                              |
| 37. | MMP-8             | Matrix metalloproteinase-8                                            |
| 38. | MMP- 9            | Matrix metalloproteinase-9                                            |
| 39. | mSBI              | Modified sulcus bleeding index                                        |
| 40. | min               | Minute                                                                |
| 41. | µm                | Micrometer                                                            |
| 42. | mm                | Millimeter                                                            |
| 43. | mW                | Milliwatt                                                             |
| 44. | M/F               | Male/ Female                                                          |
| 45. | MTZ               | Metronidazole                                                         |
| 46. | n                 | Sample size                                                           |
| 47. | N                 | No                                                                    |
| 48. | nm                | Nanometer                                                             |
| 49. | NSPT              | Non-surgical periodontal therapy                                      |
| 50. | NI                | No information                                                        |
| 51. | NA                | Not applicable                                                        |
| 52. | NS                | Not specified                                                         |
| 53. | PI                | Plaque index                                                          |
| 54. | P.i.              | Prevotella intermedia                                                 |
| 55. | P.g.              | Porphyromonas gingivalis                                              |
| 56. | PBM               | Photobiomodulation                                                    |
| 57. | PGE 2             | Prostaglandin E2                                                      |
| 58. | PG                | Parallel group                                                        |
| 59. | PRISMA            | Preferred Reporting Items for Systematic Reviews and Meta-Analyses    |
| 60. | PROSPERO          | Prospective Register Of Systematic Reviews                            |
| 61. | PPD/PD            | Probing pocket depth                                                  |
| 62. | PMN               | Polymorphonuclear neutrophil                                          |
| 63. | qPCR              | Quantitative polymerase chain reaction                                |
| 64. | Q                 | Cochran's heterogeneity statistic                                     |
| 65. | RAL               | Relative attachment level                                             |
| 66. | RANKL             | Receptor activator of nuclear factor kappa-B ligand                   |
| 67. | RoB 2             | Revised Cochrane Risk-of-Bias tool for Randomized trials, Version 2.0 |
| 68. | RCT               | Randomized clinical trial                                             |
| 69. | RT-PCR            | Reverse transcription polymerase chain reaction                       |
| 70. | SRP               | Scaling and Root planing                                              |
| 71. | SBI               | Sulcus bleeding index                                                 |
| 72. | SD                | Standard deviation                                                    |

|     |                   |                                    |
|-----|-------------------|------------------------------------|
| 73. | SM                | Split mouth                        |
| 74. | SE                | Standard error                     |
| 75. | SMD               | Standardized mean difference       |
| 76. | SFFR              | Sulcus fluid flow rate             |
| 77. | sec/ s            | Second                             |
| 78. | TBO               | Toluidene blue O                   |
| 79. | TNF- $\alpha$     | Tumor necrosis factor- alpha       |
| 80. | TDS               | Three times daily                  |
| 81. | T.f.              | Tannerella forsythia               |
| 82. | T.d.              | Treponema denticola                |
| 83. | UPD               | Ultrasonic periodontal debridement |
| 84. | VPI               | Visual plaque index                |
| 85. | W                 | Watt                               |
| 86. | W/cm <sup>2</sup> | Watts per square centimeter        |
| 87. | Y                 | Yes                                |
| 88. | %                 | Percentage                         |
